# Supplementary material for: A Novel Combination of Blood Biomarkers and Clinical Stroke Scales Facilitates Detection of Large Vessel Occlusion Ischemic Strokes
Source: MDPI journal article supplement (doi:10.3390/diagnostics11071137), 2021-06-22
Supplement: s1 [file s1]

## Supplementary Information

**Title:** Combination of blood biomarkers and stroke scales improves identification of large vessel occlusions

**Authors:** Edoardo Gaude<sup>1,\*</sup>, Barbara Nogueira<sup>1</sup>, Marcos Ladreda Mochales<sup>1</sup>, Sheila Graham<sup>2</sup>, Sarah Smith<sup>2</sup>, Lisa Shaw<sup>3</sup>, Sara Graziadio<sup>4</sup>, Gonzalo Ladreda Mochales<sup>1</sup>, Philip Sloan<sup>2</sup>, Joshua D. Bernstock<sup>5</sup>, Shashank Shekhar<sup>6</sup>, Toby I. Gropen<sup>7</sup>, Christopher I. Price<sup>3</sup>

### Supplementary Tables

Supplementary Table S1.

|                  | All        | LVO          | NonLVO                 | P-value     |
|------------------|------------|--------------|------------------------|-------------|
| n                | 128        | 23           | 105                    |             |
| D-dimer (µg/mL)  | 0.5 (0.66) | 1.3 (2.0)    | 0.4 (0.4)              | < 0.001 *** |
| OPN (ng/mL)      | 1.3 (1.2)  | 1.7 (1.1)    | 1.2 (1.1)              | 0.02 *      |
| OPG (pg/mL)      | 100 (63)   | 125 (60)     | 96 (54)                | 0.01 *      |
| vWF (µg/mL)      | 12.4 (6.9) | 12.9 (7.4)   | 12 (7.3)               | 0.16        |
| ADAMTS13 (ng/mL) | 1000 (303) | 1074 (297)   | 985 (306)              | 0.47        |
|                  |            |              |                        |             |
|                  | All        | Haemorrhagic | Ischaemic / Non-stroke | P-value     |
| GFAP (pg/mL)     | 188 (952)  | 1043 (2581)  | 66 (127)               | 0.03 *      |

Plasma concentrations of blood biomarkers measured in all patients, LVO, and non-LVO patients. Median values are reported with IQR values shown in brackets. Wilcoxon-Mann Whitney p-values are shown.

Supplementary Table S2.

|         | All   | LVO   | Non-LVO | P-value |
|---------|-------|-------|---------|---------|
| N       | 122   | 23    | 99      |         |
| C_STAT  | 0 (1) | 1 (2) | 0 (0)   | < 0.001 |
| EMSA    | 3 (4) | 5 (1) | 2 (3)   | < 0.001 |
| FAST    | 1 (1) | 2 (1) | 1 (2)   | < 0.001 |
| FAST_ED | 1 (3) | 5 (3) | 1 (2)   | < 0.001 |
| FAST    | 1 (1) | 2 (1) | 1 (2)   | < 0.001 |
| RACE    | 1 (3) | 7 (6) | 0 (2)   | < 0.001 |

Median values of stroke severity scales obtained for all patients, LVO, and non-LVO patients. IQR values shown in brackets. Wilcoxon-Mann Whitney was used to calculate p-values.

Supplementary Table S3.

| Model                | Parameters | Beta  | CI             | OR (95% CI)            | Pvalue |
|----------------------|------------|-------|----------------|------------------------|--------|
| C-STAT               | C-STAT     | 2.32  | 0.47 to 1.28   | 2.35 (1.60 to 3.61)    | <0.001 |
| C-STAT + biomarkers  | C-STAT     | 3.02  | 0.6 to 1.73    | 3.03 (1.82 to 5.67)    | <0.001 |
|                      | D-dimer    | 3.26  | 0.75 to 2.16   | 16.56 (4.46 to 75.93)  | <0.001 |
|                      | GFAP       | -2.48 | -1.79 to -0.36 | 0.15 (0.03 to 0.48)    | <0.01  |
| EMSA                 | EMSA       | 4.47  | 0.56 to 1.4    | 2.54 (1.74 to 4.07)    | <0.001 |
| EMSA + biomarkers    | EMSA       | 5.7   | 0.68 to 1.86   | 3.29 (1.98 to 6.4)     | <0.001 |
|                      | D-dimer    | 3.38  | 0.74 to 2.32   | 18.4 (4.44 to 103.73)  | <0.001 |
|                      | GFAP       | -3.15 | -2.32 to -0.41 | 0.09 (0.01 to 0.44)    | 0.01   |
| FAST                 | FAST       | 3.79  | 0.91 to 2.27   | 4.61 (2.48 to 9.71)    | <0.001 |
| FAST + biomarkers    | FAST       | 4.85  | 1.14 to 3      | 7.07 (3.12 to 20.06)   | <0.001 |
|                      | D-dimer    | 3.47  | 0.79 to 2.36   | 19.79 (4.83 to 111.98) | <0.001 |
|                      | GFAP       | -2.77 | -2.08 to -0.35 | 0.12 (0.02 to 0.5)     | 0.01   |
| FAST-ED              | FAST-ED    | 4.14  | 0.48 to 1.03   | 2.07 (1.62 to 2.8)     | <0.001 |
| FAST-ED + biomarkers | FAST-ED    | 6.3   | 0.7 to 1.67    | 3.03 (2.02 to 5.3)     | <0.001 |
|                      | D-dimer    | 3.66  | 0.7 to 2.67    | 23.43 (4.06 to 209.78) | 0.001  |
|                      | GFAP       | -3.95 | -2.79 to -0.73 | 0.05 (0 to 0.23)       | <0.01  |
| RACE                 | RACE       | 3.9   | 0.36 to 0.74   | 1.7 (1.43 to 2.1)      | <0.001 |
| RACE + biomarkers    | RACE       | 5.01  | 0.43 to 1.05   | 1.98 (1.53 to 2.86)    | <0.001 |
|                      | D-dimer    | 3.5   | 0.71 to 2.47   | 20.38 (4.14 to 138.41) | <0.001 |
|                      | GFAP       | -3.57 | -2.91 to -0.43 | 0.06 (0 to 0.43)       | 0.03   |

Univariate and multivariable logistic regression models for LVO prediction.

The p-values indicate statistical significance of the model covariate.

Supplementary Table S4.

|                     | Hemorrhagic | Ischemic LVO | Ischemic SVO | Mimics | TIA |
|---------------------|-------------|--------------|--------------|--------|-----|
| Reference Standard  | 16          | 23           | 42           | 26     | 15  |
| DDimer+GFAP         | 1           | 13           | 5            | 1      | 2   |
| C-STAT              | 3           | 9            | 1            | 3      | 0   |
| C-STAT+DDimer+GFAP  | 1           | 17           | 3            | 2      | 1   |
| EMSA                | 1           | 4            | 1            | 0      | 0   |
| EMSA+DDimer+GFAP    | 1           | 20           | 4            | 1      | 0   |
| FAST                | 2           | 5            | 1            | 0      | 1   |
| FAST+DDimer+GFAP    | 2           | 19           | 4            | 1      | 2   |
| FAST-ED             | 4           | 16           | 0            | 3      | 0   |
| FAST-ED+DDimer+GFAP | 1           | 21           | 0            | 3      | 0   |
| RACE                | 5           | 16           | 0            | 1      | 0   |
| RACE+DDimer+GFAP    | 3           | 20           | 2            | 3      | 0   |

Number of patients selected by each model or stroke scale, compared to the reference standard. Number of patients selected are divided into the different subtypes of suspected stroke.

Supplementary Table S5.

| <b>Scale</b>   | <b>All</b> | <b>LVO</b> | <b>NonLVO</b> | <b>Pvalue</b> |
|----------------|------------|------------|---------------|---------------|
| <b>C_STAT</b>  | 0 (1)      | 3 (3)      | 0 (0)         | p < 0.001     |
| <b>EMSA</b>    | 3 (3.5)    | 5 (1)      | 2.5 (3)       | p < 0.001     |
| <b>FAST</b>    | 2 (1)      | 3 (1)      | 1 (1.75)      | p < 0.001     |
| <b>FAST_ED</b> | 1 (3)      | 7 (2)      | 1 (2)         | p < 0.001     |
| <b>RACE</b>    | 1 (4.5)    | 9 (1)      | 1 (2)         | p < 0.001     |

Median values of stroke severity scales obtained for all patients, LVO, and non-LVO

patients. IQR values shown in brackets. Wilcoxon-Mann Whitney was used to calculate p-values.

## Supplementary Figures

Supplementary Figure S1. Diagnostic categorization.

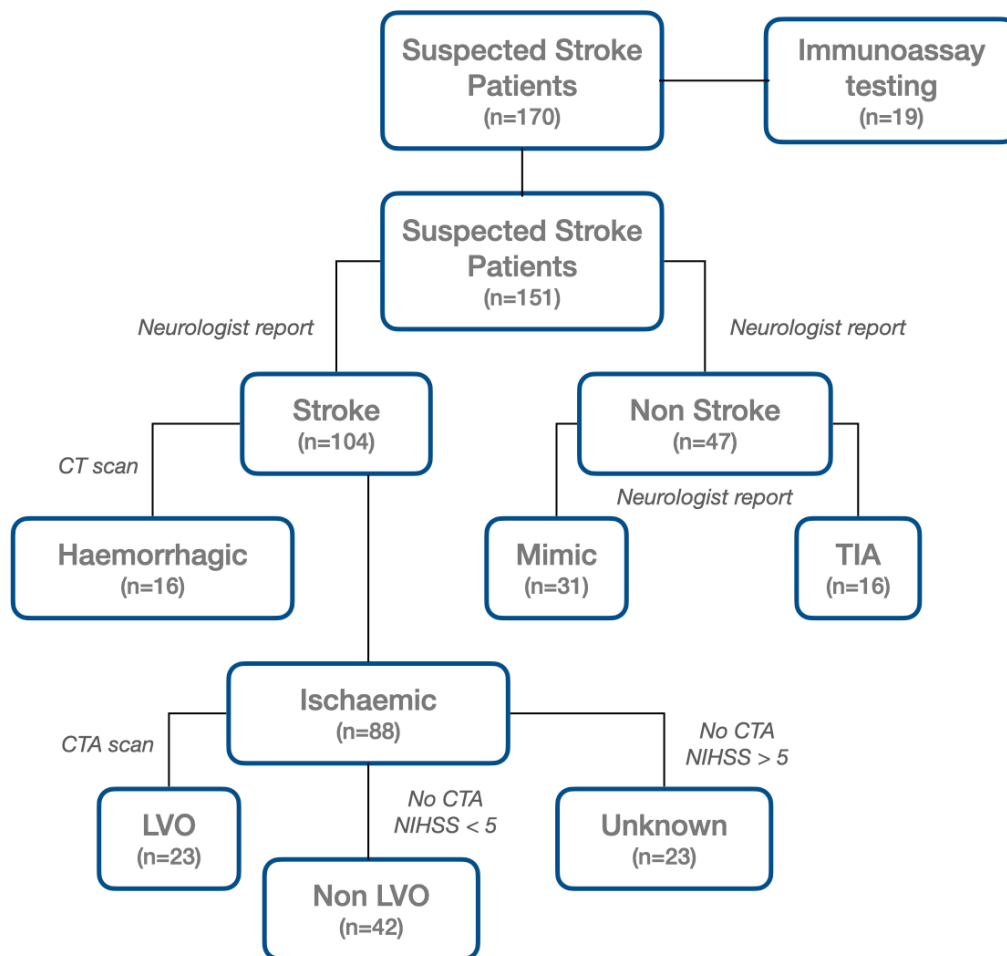

Supplementary Figure S1. Each box represents different types of stroke subtype or suspected stroke. Number of each patient categorised in different subtypes is reported in brackets. Italic text outside each box indicates the methods used to assign diagnosis.

Supplementary Figure S2. Bi-directional stepwise feature selection.

```

Start:  AIC=122.56
Diagnosis2 ~ 1

      Df Deviance  AIC
+ DDimer  1  98.973 102.97
+ OPG     1 116.047 120.05
+ OPN     1 117.372 121.37
<none>    120.555 122.56
+ vWF     1 118.776 122.78
+ GFAP    1 119.000 123.00
+ ADAMTS13 1 120.092 124.09

Step:  AIC=102.97
Diagnosis2 ~ DDimer

      Df Deviance  AIC
+ GFAP  1  94.332 100.33
+ ADAMTS13 1  96.278 102.28
<none>    98.973 102.97
+ OPN     1  96.981 102.98
+ OPG     1  98.486 104.49
+ vWF     1  98.972 104.97
- DDimer  1 120.555 122.56

Step:  AIC=100.33
Diagnosis2 ~ DDimer + GFAP

      Df Deviance  AIC
<none>    94.332 100.33
+ OPN     1  92.340 100.34
+ ADAMTS13 1  92.790 100.79
+ OPG     1  93.871 101.87
+ vWF     1  94.128 102.13
- GFAP    1  98.973 102.97
- DDimer  1 119.000 123.00

```

Supplementary Figure S2. Output of the bi-directional multi-step selection performed on the panel of 6 biomarkers. The steps show how the selection of D-dimer and GFAP was achieved based on AIC values.
